# Supplementary material
Source: PubMed Central journal article supplement (PMC3936312)

PBCre4\**Trsp*<sup>fl/fl</sup>

6 weeks

24 weeks

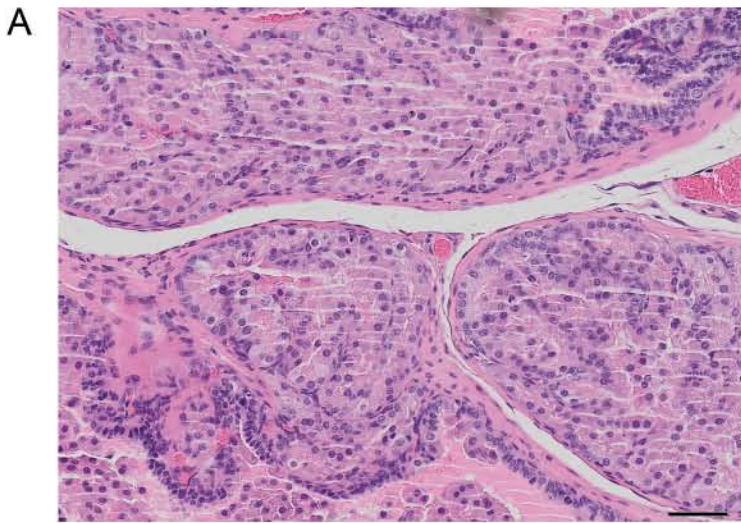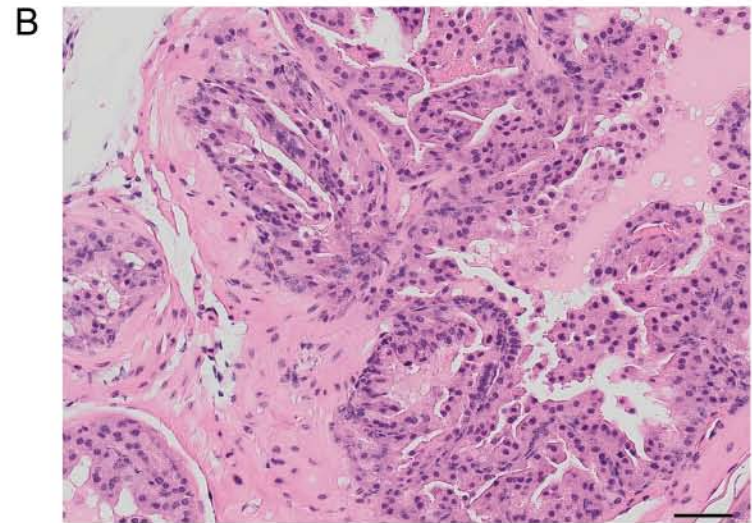

*Trsp*<sup>fl/fl</sup>

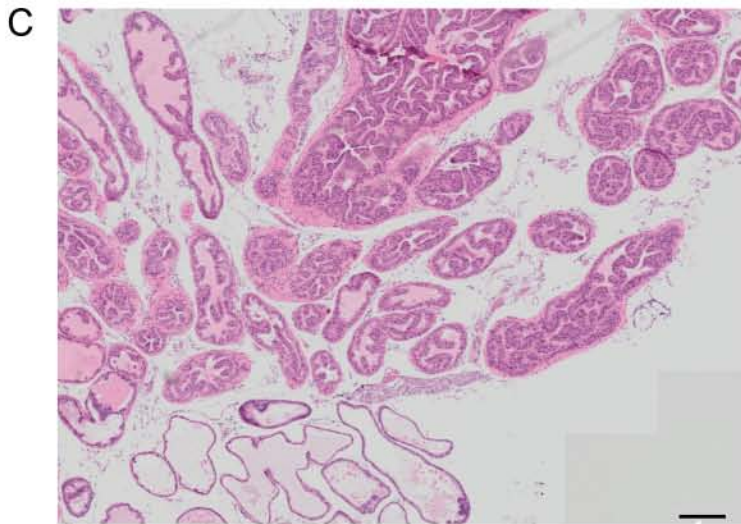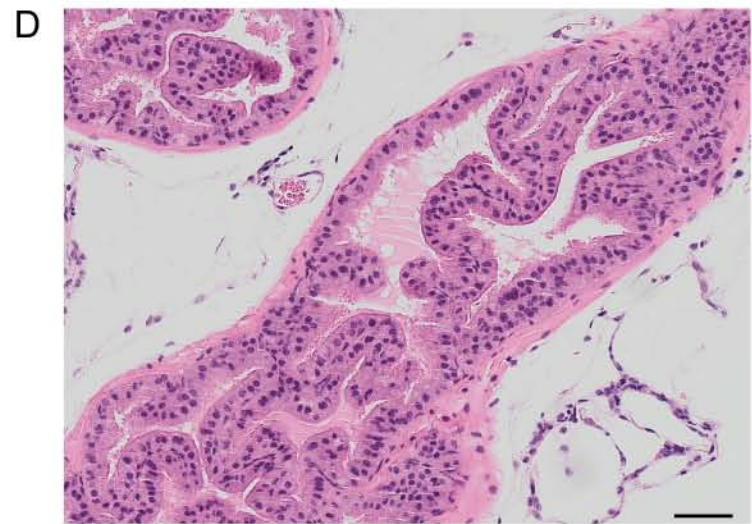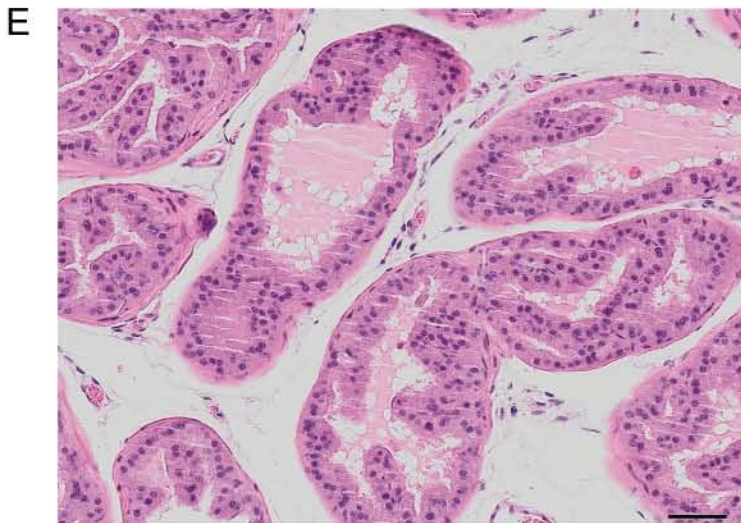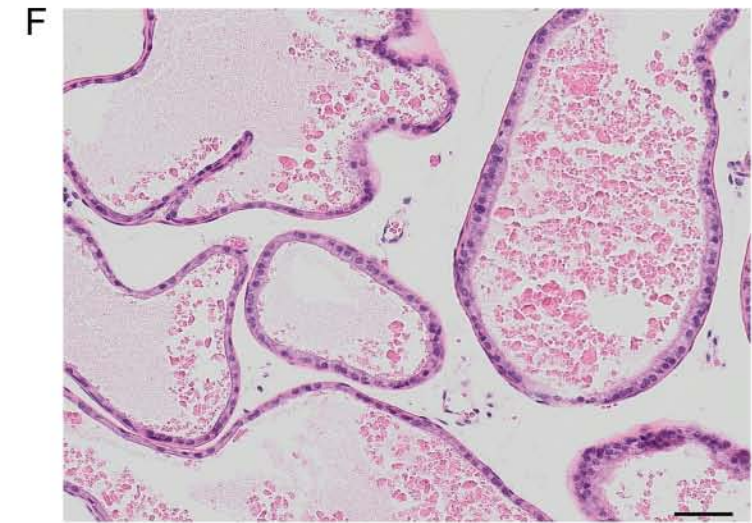

Supplement: mmc1.pdf [file mmc1.pdf]
